# Supplementary material
Source: PubMed Central journal article supplement (PMC1421500)
Supplement: nar_34_6_1755__2.pdf [file nar_34_6_1755__2.pdf]

**Supplementary Table 1.** Primers used in constructing hybrid endonuclease genes.

|                                             |                                                                                                              |
|---------------------------------------------|--------------------------------------------------------------------------------------------------------------|
| The common primers                          | I-TevI forward primer: IDT0147, 5'-GGCGGCTCTAGAA-ATAATTTTGTTTAACTTTAAGAAGGAGATATACATATGAAAAGCGGAATTTATCAG-3' |
|                                             | I-BmoI reverse primer: IDT0148, 5'-CCGGATCCTTAAT-CCTATTTGTAAAAGTATCC-3'                                      |
| The specific primers to amplify H-TevBmoV1: | Tev-Nfrag, 5'-ACACATTGCCATCGCTTAGCTTTCCGAC-CATCAGGTCCAAG-3'                                                  |
|                                             | 8718-Cfrag, 5'-GCTAAGCGATGGCAATGTGTTCAAGG-3'                                                                 |
| The specific primers to amplify H-TevBmoV2: | IDT0149, 5'-AAGAAACGTTCTGAATTGAAGAAAGTTT-ATTTGAAGATGACA-3'                                                   |
|                                             | IDT0150, 5'-CTTCAAATAAACTTTCTTCAATTCAGAAC-GTTTCTTAATAAT-3'                                                   |
| The specific primers to amplify H-TevBmoV3: | IDT0151, 5'-TGGAATCCAGAAACCCATGAAACGACA-AAGCTAAAG-3'                                                         |
|                                             | IDT0152, 5'-AATCTTTAGCTTTGTCGTTTCATGGGTTT-CTGGATTCCAACG-3'                                                   |
| The specific primers to amplify H-TevBmoV4: | IDT0155, 5'-GCTTATACTTGTAGTAAATGCTCTCAAA-GAGTGGGTGAAAAA-3'                                                   |
|                                             | IDT0156, 5'-TTTTTCACCCACTCTTTGAGAGCATTAC-TACAAGTATAAGC-3'                                                    |
| The specific primers to amplify H-TevBmoV5: | IDT0153, 5'-ACTTGTAGTAAATGCGAAACGACAAAGC-T-AAGATTTCAAAT-3'                                                   |
|                                             | IDT0154, 5'-AATCTTTAGCTTTGTCGTTTCGCATTAC-TACAAGTATAAGC-3'                                                    |
